# Supplementary material
Source: Copernicus journal article supplement (doi:10.5194/egusphere-2026-2896)
Supplement: Supplementary file 1 [file egusphere-2026-2896-supplement.pdf]

**The inversion framework:** Our inversion framework is built upon the TM5 4DVar system (Meirink et al., 2008), modified to jointly assimilate measurements of  $\text{CO}_2$  and  $\Delta^{14}\text{CO}_2$  in a multi-tracer inversion framework (Basu et al., 2020; Basu et al., 2016). The isotopic mass balance equations for this framework can be found in Basu et al. (2016). In the main text we describe the cost function to be minimized in order to estimate five fluxes categories (Section 2.3). We followed the prescription of Basu et al. (2016) to set up the prior covariance ( $B$ ) for the five flux categories, keeping the default “hybrid” prior correlation structure unchanged but changing the prior uncertainties ( $\sigma$  in Table 1 of Basu et al. (2016)). Table S2 lists prior uncertainties for both years along with previously assigned uncertainties for the five flux categories. Posterior flux sensitivity to alternate specifications of temporal and spatial error correlations ( $C_t$  and  $C_r$  respectively in eq. 4 of Basu et al. (2016)) are discussed in the main text. For  $\Delta^{14}\text{CO}_2$  observations, we constructed elements of  $R$  as the quadrature sum of a measurement uncertainty of 1.8‰ and a transport model error computed from modeled tracer gradients across neighboring cells. For  $\text{CO}_2$  observations, the elements of  $R$  were quantified following the empirical scheme used in the CarbonTracker 2022 data assimilation system (Jacobson et al., 2023). This differs from our previous studies (Basu et al., 2020; Basu et al., 2016) in which elements of  $R$  for  $\text{CO}_2$  measurements were calculated as the quadrature sum of a model uncertainty (computed as above) and a site-specific measurement uncertainty.

**Initial concentrations:**

Our inversion setup for year  $Y$  optimizes fluxes for six months (July—December) in year  $Y-1$ , and three months (January—March) in year  $Y+1$ , following earlier work (Basu et al., 2020; Basu et al., 2016). The two largest contributions to the uncertainty of the initial  $\Delta^{14}\text{CO}_2$  field on July 1 of either 2009 or 2014 are (a) the vertical profile of  $\Delta^{14}\text{CO}_2$  that is a balance between  $^{14}\text{C}$  production in the upper atmosphere and the oceanic  $^{14}\text{CO}_2$  sink, and (b) a possible offset in the initial  $\Delta^{14}\text{CO}_2$  field due to the insufficiency of background measurements to constrain it. To test the sufficiency of our spin-up period and the impact of the above uncertainties on derived FFCO<sub>2</sub> estimates, we performed two sets of experiments for Basu et al. (2016) and Basu et al. (2020). First, we performed three inversions with three different initial  $\Delta^{14}\text{CO}_2$  fields derived from the three possible stratospheric  $^{14}\text{CO}_2$  injection profiles discussed in Miller et al. (2025). Second, we performed an alternate inversion by adding a 3‰ uniform offset to the initial  $\Delta^{14}\text{CO}_2$  field. In both those experiments, the derived FFCO<sub>2</sub> fluxes after three months, i.e., after September 2009, were virtually indistinguishable across the different inversions. This led us to conclude that a six-month spin-up was sufficient for constraining FF CO<sub>2</sub> fluxes in our setup. We also desired a spin-down period of sufficient length using measurements in either 2011 or 2016 to accurately constrain end of year fluxes in 2010/2015. In the northern temperate latitudes, air typically circumnavigates the globe in 2-3 weeks, and the air mass north of 25°N – where the majority of our  $\Delta^{14}\text{CO}_2$  measurements are located becomes well-mixed within ~3 months. Hence, we specify a three-month spin-down period.

The initial fields of  $\text{CO}_2$  and  $\text{CO}_2 \times \Delta^{14}\text{CO}_2$  on July 1, 2009 and 2014, needed for the two inversion years 2010 and 2015 respectively, were constructed slightly differently. We ran a forward simulation of the two tracers from Jan 1, 2000 to Jan 1, 2008 using the fluxes detailed in Miller et al. (2025). We then performed a multi-tracer  $\text{CO}_2$  and  $\Delta^{14}\text{CO}_2$  inversion from Jan 1, 2008 to

Jul 1, 2009, and used the posterior fields on that ending date as the initial fields for our year 2010 inversion. To obtain the initial fields on Jul 1, 2014 for our year 2015 inversion, we scaled the posterior mole fraction fields on Apr 1, 2011 that resulted from our year 2010 inversion. Specifically, to scale the 3D  $\text{CO}_2 \times \Delta^{14}\text{CO}_2$  field, we first obtained the global average  $\Delta^{14}\text{CO}_2$  for 01 April 2011 and 01 July 2014 from the long-term Northern and Southern hemispheric records. We multiplied these two values by the corresponding global mean marine surface  $\text{CO}_2$  concentrations, and then subtracted the 01 July 2014 quantity from the 01 April 2011 quantity. The resulting difference of approximately 5 was uniformly subtracted from the posterior 3D  $\text{CO}_2 \times \Delta^{14}\text{CO}_2$  field of 01 April 2011 to yield the scaled 3D field for 01 July 2014. The scaled 3D  $\text{CO}_2 \times \Delta^{14}\text{CO}_2$  field was obtained more simply by uniformly multiplying the 3D  $\text{CO}_2$  field of 01 April 2011 by the ratio of the global mean marine surface  $\text{CO}_2$  concentration between 01 July 2014 and 01 April 2011. Given the results showing insensitivity to deliberate misrepresentation of initial fields after 3 months of spin-up, sensitivity to small errors in our specified estimates of initial  $\text{CO}_2 \times \Delta^{14}\text{CO}_2$  fields in either year is expected to be negligible.

**Table S1:**  $\Delta^{14}\text{CO}_2$  observing sites and relevant measurement laboratories along with the number of site specific assimilated  $\Delta^{14}\text{CO}_2$  observations for each inversion period and those for Basu et al. (2020).

| Site Name                                                                               | Code | Lat/Lon       | Group                                          | Platform                   | Assimilated Observations (n) <sup>a</sup> |                 |      |
|-----------------------------------------------------------------------------------------|------|---------------|------------------------------------------------|----------------------------|-------------------------------------------|-----------------|------|
|                                                                                         |      |               |                                                |                            | 2010<br>(Basu et al.,<br>2020)            | 2010-<br>update | 2015 |
| Alert, NU,<br>Canada                                                                    | ALT  | 82.5/-62.31   | Environment and<br>Climate<br>Change<br>Canada | Surface                    | 0                                         | 16              | 33   |
| Argyle, ME,<br>USA                                                                      | AMT  | 45.03/-68.68  | NOAA                                           | Surface                    | 101                                       | 101             | 133  |
| Barrow, AK,<br>USA                                                                      | BRW  | 71.32/-156.61 | NOAA                                           | Surface                    | 89                                        | 89              | 78   |
| Cape Grim,<br>TAS, AU                                                                   | CGO  | -40.68/144.69 | SIO                                            | Surface                    | 22                                        | 32              | 23   |
| Offshore Cape<br>May, NJ, USA                                                           | CMA  | 38.78/-74.56  | NOAA                                           | Aircraft                   | 130                                       | 119             | 83   |
| Carbon in<br>Arctic<br>Reservoirs<br>Vulnerability<br>Experiment<br>(CARVE), AK,<br>USA | CRV  | 60.41/-164.04 | NOAA                                           | Aircraft                   | 0                                         | 0               | 3    |
| Dahlen, ND,<br>USA                                                                      | DND  | 47.24/-99.49  | NOAA                                           | Aircraft                   | 0                                         | 0               | 51   |
| Drake Passage                                                                           | DRP  | -59.18/-65.42 | NOAA                                           | Shipboard                  | 42                                        | 21              | 29   |
| Estevan Point,<br>BC, CAN                                                               | ESP  | 49.34/-126.56 | NOAA                                           | Aircraft                   | 0                                         | 0               | 65   |
| Harvard<br>Forest, MA,<br>USA                                                           | HFM  | 42.54/-72.17  | Harvard<br>University                          | Surface                    | 0                                         | 0               | 6    |
| Indianapolis<br>flux<br>Experiment<br>(INFLUX), IN,<br>USA <sup>b</sup>                 | INX  | 39.58/-86.52  | NOAA                                           | Surface                    | 16                                        | 16              | 88   |
| Izana,<br>Tenerife,<br>Canary Islands,<br>ESP                                           | IZO  | 28.31/-16.5   | AEMET                                          | Surface                    | 0                                         | 37              | 37   |
| Jungfraujoch,<br>CH                                                                     | JFJ  | 46.55/7.99    | KUP                                            | Surface                    | 21                                        | 1               | 45   |
| Park Falls, WI,<br>USA                                                                  | LEF  | 45.78/-90.37  | NOAA                                           | Surface<br>and<br>Aircraft | 150                                       | 150             | 194  |

|                                               |     |                |       |           |       |       |       |
|-----------------------------------------------|-----|----------------|-------|-----------|-------|-------|-------|
| Mt. Bachelor Observatory<br>OR, USA           | MBO | 43.98/-121.69  | NOAA  | Surface   | 0     | 0     | 45    |
| Mace Head,<br>County Galway,<br>Ireland       | MHW | 53.33/-9.9     | NOAA  | Surface   | 0     | 6     | 43    |
| Mt. Wilson Observatory<br>CA, USA             | MWO | 34.22/-118.06  | NOAA  | Surface   | 58    | 57    | 73    |
| Offshore Portsmouth,<br>NH, USA               | NHA | 42.82/-70.63   | NOAA  | Aircraft  | 92    | 89    | 79    |
| Niwot Ridge,<br>CO, USA                       | NWR | 40.05/-105.59  | NOAA  | Surface   | 133   | 68    | 75    |
| Pacific Ocean                                 | POC | -30.82/-178.72 | NOAA  | Shipboard | 0     | 0     | 179   |
| Beech Island,<br>SC, USA                      | SCT | 33.41/-81.83   | NOAA  | Surface   | 167   | 166   | 178   |
| Schauinsland,<br>Baden-<br>Wuerttemberg<br>DE | SSL | 47.9/7.92      | SCHAU | Surface   | 20    | 0     | 0     |
| Tae-ahn Peninsula,<br>KOR                     | TAP | 36.73/126.13   | NOAA  | Surface   | 46    | 0     | 0     |
| West Branch,<br>IA, USA                       | WBI | 41.72/-91.35   | NOAA  | Surface   | 0     | 0     | 146   |
| Walnut Grove,<br>CA, USA                      | WGC | 38.26/-121.49  | NOAA  | Surface   | 238   | 237   | 179   |
| Moody, TX,<br>USA                             | WKT | 31.31/-97.33   | NOAA  | Surface   | 179   | 174   | 170   |
| <b>Total</b>                                  |     |                |       |           | 1,504 | 1,379 | 2,035 |

<sup>a</sup>Values refer to total number of observations assimilated in each 21-month inversion period, which includes bounding months of adjacent years (6 months before and 3 months after).

<sup>b</sup>INX data are from (Turnbull et al., 2015) and (Turnbull et al., 2019), assimilating only measurements from towers upwind of the Indianapolis urban area.

**Table S2:** Assigned prior uncertainties for the five optimized fluxes aggregated globally (for land or ocean) and for the U.S. for three experimental set-ups. Prior uncertainties for 2010 and 2015 differ because they scale to prior fluxes or prior flux components which differ from year to year. Here  $F_{\text{bio}}$  is equivalent to NBE. Absolute U.S. and global flux totals are given in **Table S6**.

| Flux                           | Experimental set-up                   |      |                      |      |                      |      |
|--------------------------------|---------------------------------------|------|----------------------|------|----------------------|------|
|                                | 2010<br>( <i>Basu et al. (2020)</i> ) |      | 2010<br>(this study) |      | 2015<br>(this study) |      |
|                                | Global                                | U.S. | Global               | U.S. | Global               | U.S. |
| $F_{\text{fos}}$ (TgC/yr)      | 340                                   | 120  | 693                  | 119  | 807                  | 117  |
| $F_{\text{bio}}$ (TgC/yr)      | 1344                                  | 313  | 1344                 | 313  | 1306                 | 317  |
| $F_{\text{oce}}$ (TgC/yr)      | 699                                   | --   | 699                  | --   | 734                  | --   |
| $F_{\text{biodis}}$ (PgC ‰/yr) | 519                                   | 84   | 1021                 | 165  | 1110                 | 176  |
| $F_{\text{ocedis}}$ (PgC ‰/yr) | 819                                   | --   | 792                  | --   | 793                  | --   |

**Table S3:** Impact of updated U. of Heidelberg CORSO data on annual national total posterior FFCO<sub>2</sub> and NBE for 2010 using the Miller/CT2022 FFCO<sub>2</sub> and CT2016 NBE priors. CORSO site codes and numbers of observations are given in **Table S4**.

| Experiment        | U.S. FFCO <sub>2</sub><br>(TgC/yr) | U.S. NBE<br>(TgC/Yr) | U.S. Total Carbon<br>(TgC/yr) |
|-------------------|------------------------------------|----------------------|-------------------------------|
| w/o update        | 1745                               | -231                 | 1514                          |
| w/ update         | 1755                               | -240                 | 1515                          |
| <b>Difference</b> | <b>10</b>                          | <b>9</b>             | <b>1</b>                      |

**Table S4:** CORSO site codes with numbers of assimilated <sup>14</sup>C observations for 2010 with and without the CORSO data update. Site names and locations are given in **Table S1**.

| Site code    | No. of obs. with update | No. of obs. w/o update |
|--------------|-------------------------|------------------------|
| ALT          | 21                      | 12                     |
| CGO          | 19                      | 19                     |
| IZO          | 19                      | 19                     |
| JFJ          | 18                      | 0                      |
| MHW          | 22                      | 2                      |
| MQA          | 18                      | 0                      |
| NMY          | 23                      | 0                      |
| <b>Total</b> | <b>140</b>              | <b>52</b>              |

**Table S5:** Adjustment categories and their national totals along with reported and adjusted national and regional FFCO<sub>2</sub> totals for EPA (EPA, 2024) and Vulcan 3.0 (Gurney et al., 2020a; Gurney et al., 2020b) reported emissions. Regional adjustments are assumed to scale to the regional fraction of total FFCO<sub>2</sub> emission for either EPA or Vulcan. The basis for imposed adjustments is discussed in Basu et al. (2020).

|                                                     |                                                                                              | <b>2010<br/>(TgC/yr)</b> | <b>2015<br/>(TgC/yr)</b> |
|-----------------------------------------------------|----------------------------------------------------------------------------------------------|--------------------------|--------------------------|
| <b>Adjustment category and national total</b>       | U.S. Bio Fuel [BF] <sup>a</sup>                                                              | 20.1                     | 24.6                     |
|                                                     | U.S. Domestic aviation [DA] <sup>b</sup>                                                     | 41.8                     | 43.4                     |
|                                                     | U.S. International aviation [IA] <sup>c</sup>                                                | 37.0                     | 37.0                     |
|                                                     | All in-country aviation up to 3000 ft [DA3000] <sup>c</sup>                                  | 20.0                     | 20.0                     |
| <b>EPA reported national and regional totals</b>    | U.S. National [EPA <sub>NR</sub> ]                                                           | 1537.6                   | 1456.7                   |
|                                                     | U.S. West [EPA <sub>WR</sub> ]                                                               | 270.4                    | 263.5                    |
|                                                     | U.S. Center [EPA <sub>CR</sub> ]                                                             | 423.8                    | 423.6                    |
|                                                     | U.S. East [EPA <sub>ER</sub> ]                                                               | 843.5                    | 769.5                    |
| <b>EPA adjusted national and regional totals</b>    | U.S. National [EPA <sub>NA</sub> = EPA <sub>NR</sub> + IA]                                   | 1574.6                   | 1493.7                   |
|                                                     | U.S. West [EPA <sub>WA</sub> = EPA <sub>WR</sub> × EPA <sub>NA</sub> / EPA <sub>NR</sub> ]   | 276.9                    | 270.2                    |
|                                                     | U.S. Center [EPA <sub>CA</sub> = EPA <sub>CR</sub> × EPA <sub>NA</sub> / EPA <sub>NR</sub> ] | 434.0                    | 434.4                    |
|                                                     | U.S. East [EPA <sub>EA</sub> = EPA <sub>ER</sub> × EPA <sub>NA</sub> / EPA <sub>NR</sub> ]   | 863.8                    | 789.1                    |
| <b>Vulcan reported national and regional totals</b> | U.S. National [V <sub>NR</sub> ]                                                             | 1638.9                   | 1544.0                   |
|                                                     | U.S. West [V <sub>WR</sub> ]                                                                 | 303.6                    | 297                      |
|                                                     | U.S. Center [V <sub>CR</sub> ]                                                               | 400.2                    | 388                      |
|                                                     | U.S. East [V <sub>ER</sub> ]                                                                 | 935                      | 858.9                    |
| <b>Vulcan adjusted national and regional totals</b> | U.S. National [V <sub>NA</sub> = V <sub>NR</sub> + DA + IA – DA3000 – BF]                    | 1677.6                   | 1579.8                   |
|                                                     | U.S. West [V <sub>WA</sub> = V <sub>WR</sub> × V <sub>NA</sub> / V <sub>NR</sub> ]           | 310.8                    | 303.9                    |
|                                                     | U.S. Center [V <sub>CA</sub> = V <sub>CR</sub> × V <sub>NA</sub> / V <sub>NR</sub> ]         | 409.6                    | 397.0                    |
|                                                     | U.S. East [V <sub>EA</sub> = V <sub>ER</sub> × V <sub>NA</sub> / V <sub>NR</sub> ]           | 957.1                    | 878.8                    |

<sup>a</sup>EIA (2024)

<sup>b</sup>Table 2-13, excel file, in the Inventory of U.S. Greenhouse gas emissions and Sinks: 1990-2022 (EPA, 2024),

<sup>c</sup>see Basu et al. (2020)

**Table S6:** Annual U.S. and global totals for prior fluxes used in the analysis.  $F_{\text{biodis}}$  and  $F_{\text{ocedis}}$  refer to the isotopic fluxes associated with terrestrial biological disequilibrium and ocean disequilibrium.

| Flux types                    | name                | 2010 |        | 2015 |        |
|-------------------------------|---------------------|------|--------|------|--------|
|                               |                     | U.S. | Global | U.S. | Global |
| FFCO <sub>2</sub><br>(TgC/yr) | Miller/CT           | 1532 | 8993   | 1465 | 9627   |
|                               | FFDAS               | 1485 | 8267   | 1433 | 8891   |
|                               | ODIAC               | 1552 | 9001   | 1496 | 9633   |
| NBE<br>(TgC/yr)               | CT16                | -283 | -1334  | -111 | -266   |
|                               | CT19B               | -343 | -971   | -263 | -794   |
|                               | SiB4                | -211 | -1949  | -201 | -1804  |
| Net Ocean<br>(TgC/yr)         | CT16                | N/A  | -2978  | N/A  | -3350  |
|                               | CT19B               | N/A  | -2919  | N/A  | -3144  |
|                               | SiB4                | N/A  | -2919  | N/A  | -3144  |
| Isotopic<br>(PgC‰/yr)         | $F_{\text{biodis}}$ | 183  | 2446   | 196  | 2632   |
|                               | $F_{\text{ocedis}}$ | N/A  | -1504  | N/A  | -683   |
|                               | Nuclear             | 100  | 486    | 100  | 486    |
|                               | Cosmogenic          | N/A  | 466    | N/A  | 3883   |

**Table S7:** 9-member uncertainty-weighted posterior mean and prior mean fluxes for 2010 and 2015, along with related MC-based uncertainties ( $1\sigma$ ) and the standard deviation ( $1\sigma$ ) of the ensemble-wide spread. Note that prior uncertainties for the SiB4-based NBE priors differ from those for the two NBE priors, leading to different posterior uncertainties for experiments using the SiB4 prior (see **Section 2.4**). MC-based uncertainties for these experiments are shown as subjacent bracketed values.

| Prior or posterior<br>by year | Flux<br>(9-member mean)<br>TgC/yr |        |      | Uncertainty<br>[using SiB4]<br>TgC/yr |            |              | 9-member Ensemble<br>S.D. ( $1\sigma$ )<br>TgC/yr |        |     |
|-------------------------------|-----------------------------------|--------|------|---------------------------------------|------------|--------------|---------------------------------------------------|--------|-----|
|                               | Total<br>Carbon                   | Fossil | NBE  | Total<br>Carbon                       | Fossil     | NBE          | Total<br>Carbon                                   | Fossil | NBE |
| 2010-prior                    | 1227                              | 1523   | -298 | 196<br>[310]                          | 78<br>[77] | 174<br>[302] | 64                                                | 30     | 57  |
| 2010-post                     | 1434                              | 1715   | -282 | 33<br>[79]                            | 26<br>[49] | 41<br>[94]   | 106                                               | 45     | 135 |
| 2015-prior                    | 1276                              | 1465   | -189 | 184<br>[315]                          | 69<br>[73] | 163<br>[307] | 72                                                | 27     | 66  |
| 2015-post                     | 1631                              | 1578   | 54   | 32<br>[57]                            | 29<br>[37] | 37<br>[64]   | 107                                               | 59     | 130 |

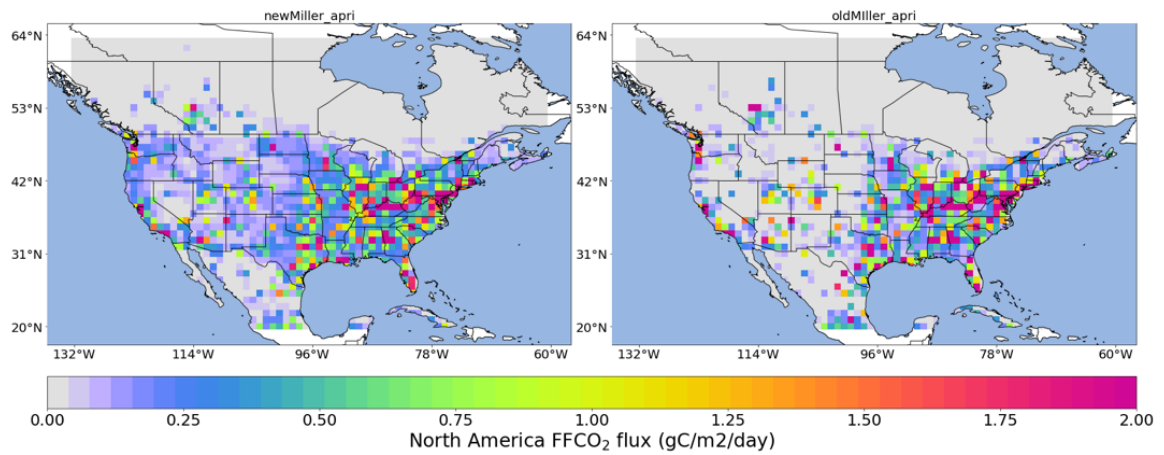

**Figure S1:** Annual mean FFCO<sub>2</sub> for 2010 for the updated Miller/CT2022 flux prior (left) compared to that from the Miller/CT2016 FFCO<sub>2</sub> prior used in Basu et al. (2020), both gridded at the zoom region resolution of 1°x1°. Note the significant change in prior emissions in the western half of the country discussed in the main text.

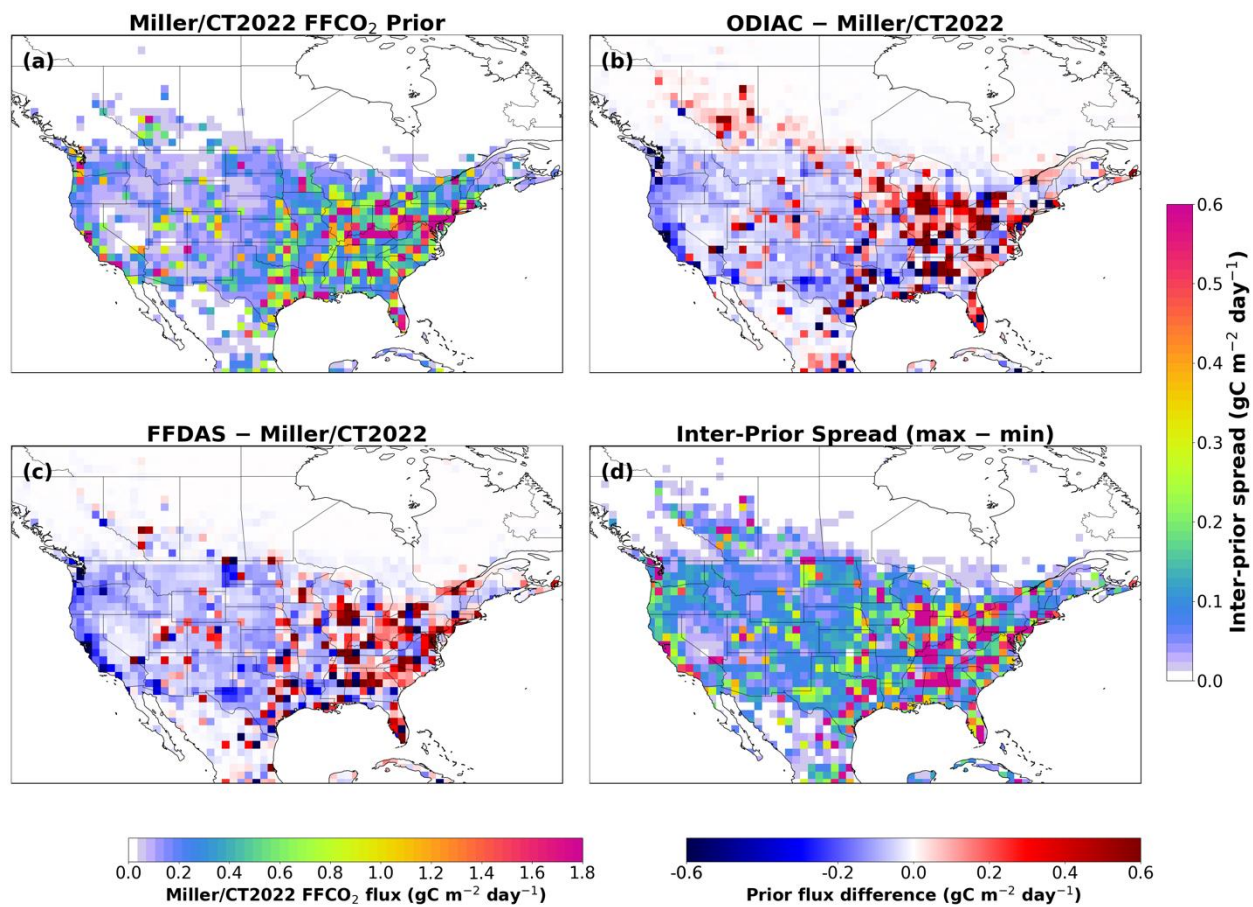

**Figure S2.** a) Annual mean Miller/CT2022 FFCO<sub>2</sub> flux prior for 2015 gridded at the zoom region resolution of 1°x1°; b) the difference between the annual average FFCO<sub>2</sub> prior from ODIAC and from Miller/CT2022 for 2015; c) same as b) but for the difference between FFDAS and Miller/CT2022; d) the inter-prior spread (maximum to minimum) across all three priors, which is used to estimate prior FFCO<sub>2</sub> uncertainty as discussed in the main text.

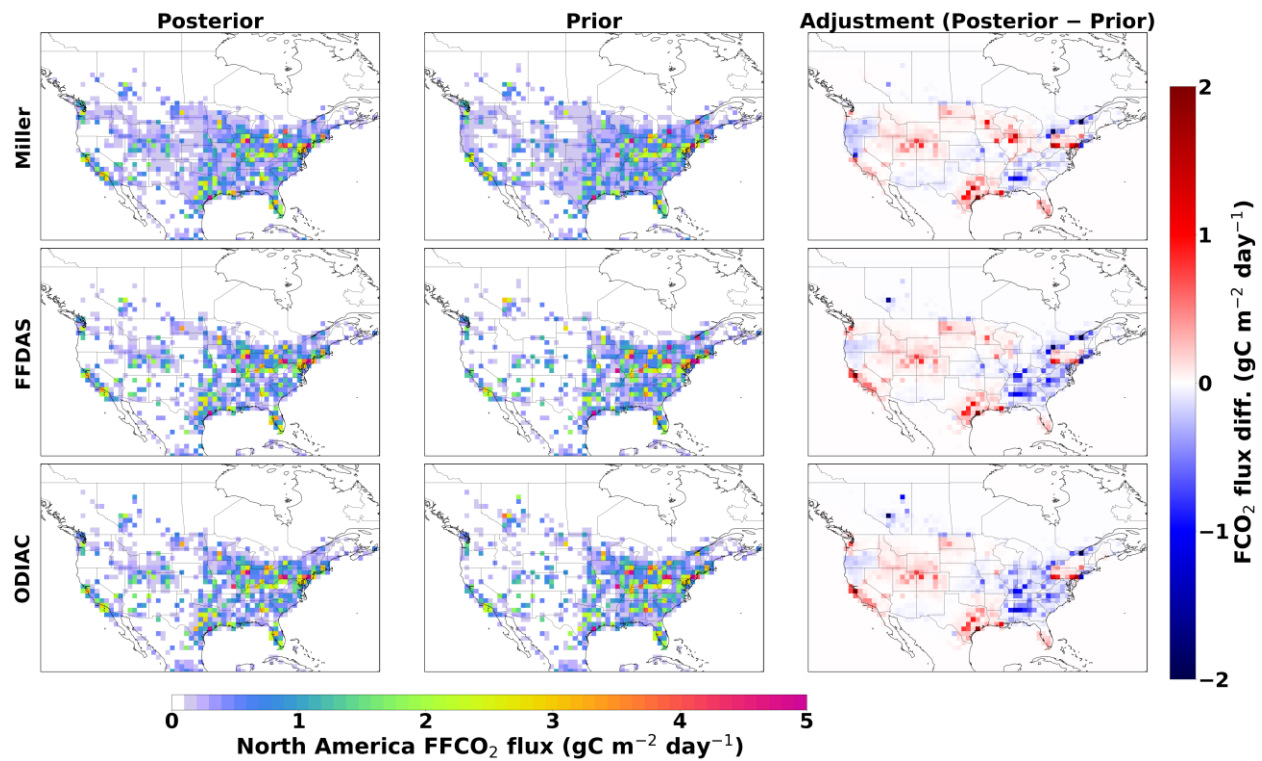

**Figure S3:** Spatial patterns of prior and posterior FFCO<sub>2</sub> fluxes and associated adjustments (posterior-prior differences) for 2010 for the Miller-CT2022 (top row), FFDAS (middle row), and ODIAC (bottom row) priors.

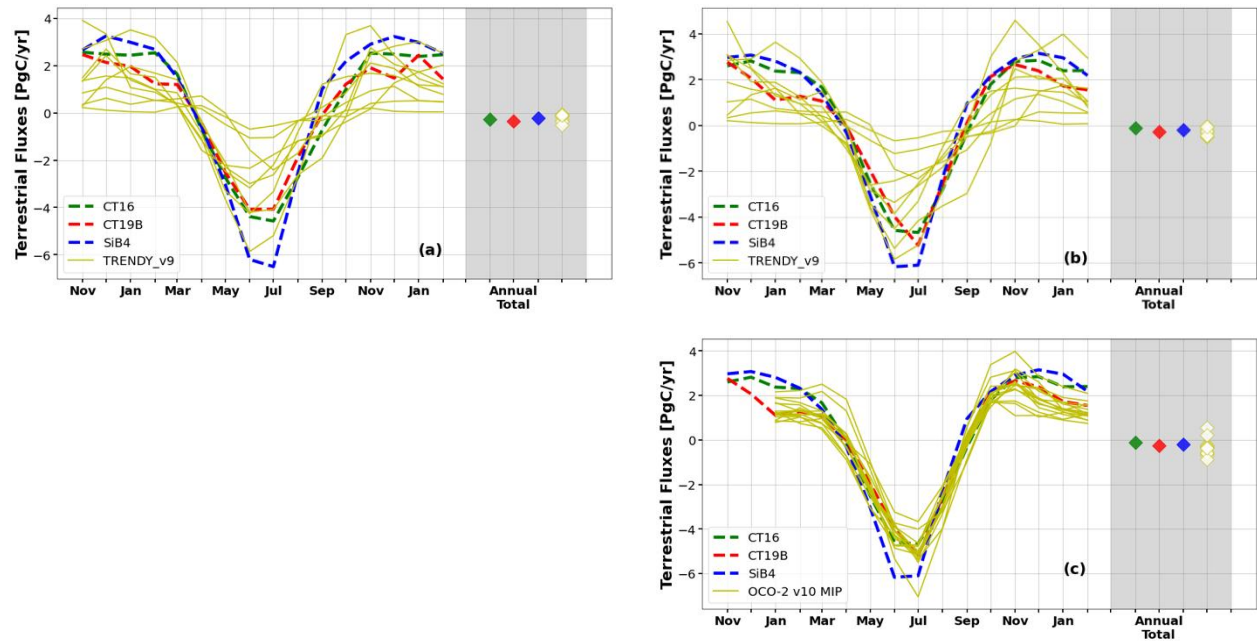

**Figure S4:** Representativeness of the seasonal cycle of NBE and its annual total for the three priors used here with respect to estimates from the TRENDY terrestrial biosphere model intercomparison (v9.0) (top; panels 'a' and 'b') and from the OCO-2 v10 model intercomparison (bottom; panel 'c'), for both 2010 (left, OCO-2 v10 MIP results unavailable) and 2015 (right). For OCO-2 v10 MIP, we used results for Land Nadir and Land Glint retrievals and in-situ measurements (LNLGIS) (16 models) after screening for results producing seemingly non-physical seasonal cycles, as discussed in the main text. Note that annualized NBE is given in PgC/yr, in contrast to TgC/yr used for discussion of annualized FFCO<sub>2</sub> fluxes.

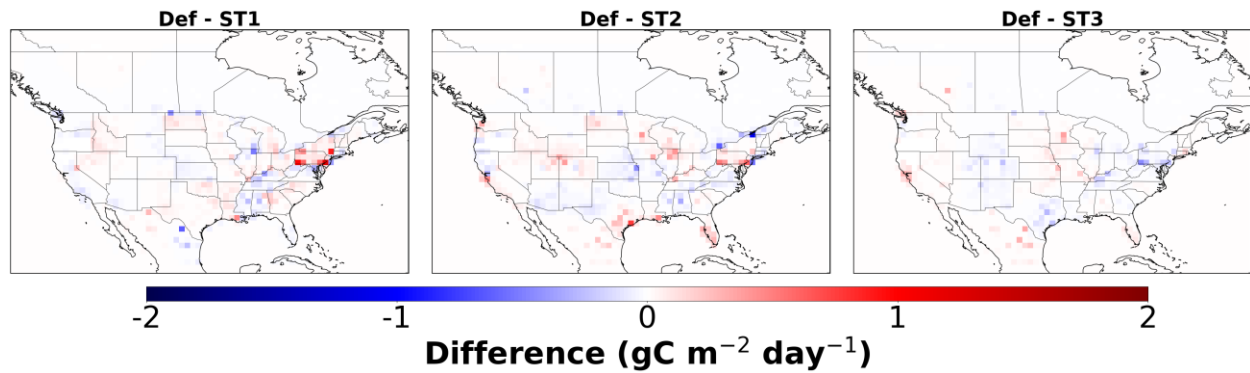

**Figure S5:** Impact of alternate treatments of spatiotemporal error correlations on the pattern of posterior annual FFCO<sub>2</sub> for sensitivity experiments ST1 (continuous exponential decay correlation function), ST2 (abbreviated temporal correlation length) and ST3 (increased error correlation length scale for NBE only), all vs. the default “hybrid” treatment of spatiotemporal error correlation discussed in the main text. The impact on annual national FFCO<sub>2</sub> totals are +26, +33, and 0 TgC/yr, respectively.

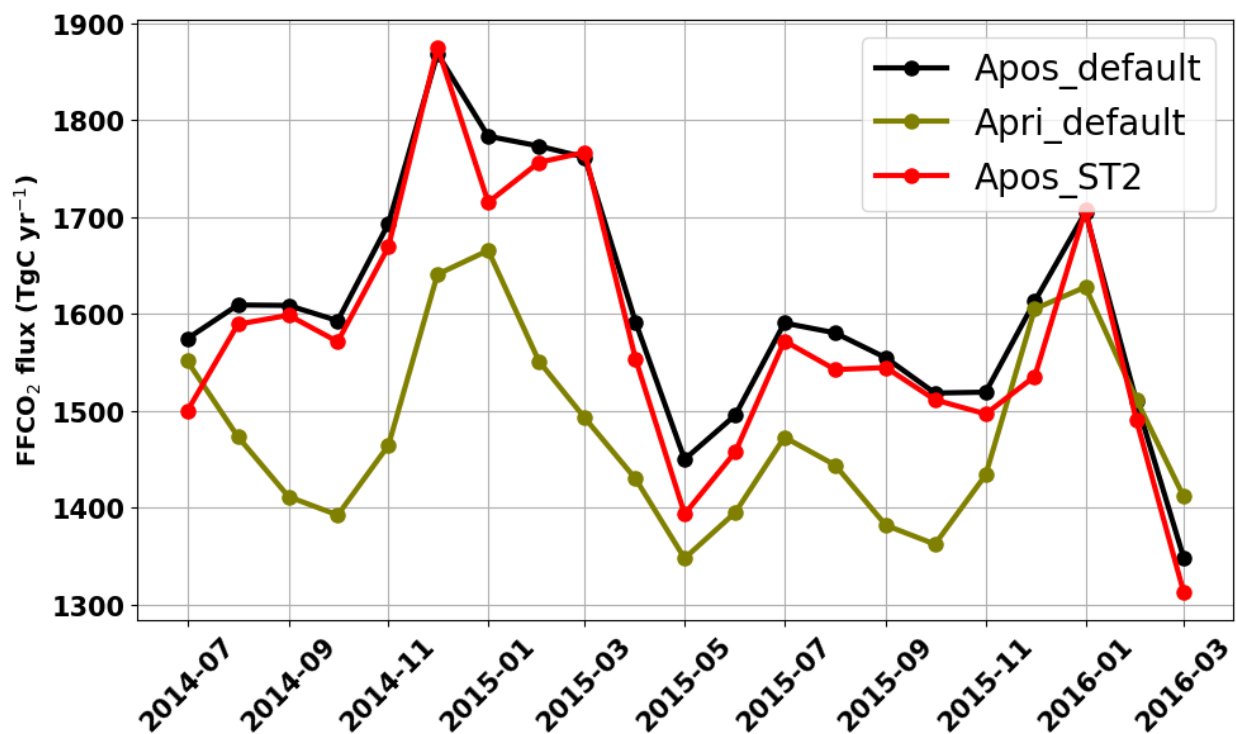

**Figure S6:** Monthly posterior FFCO<sub>2</sub> totals when using the abbreviated temporal correlation length scale (experiment ST2) compared to those when the default treatment discussed in the text. The associated prior FFCO<sub>2</sub> totals are given for comparison.

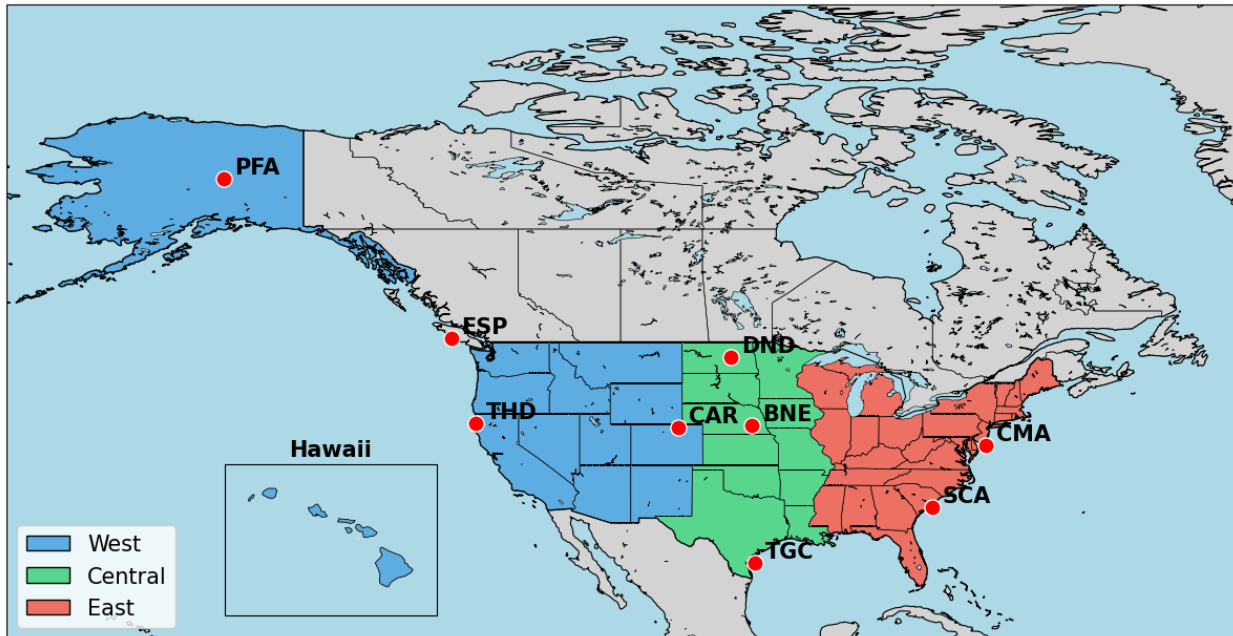

**Figure S7:** Locations of aircraft profiling sites in **Fig. 8**. Eastern, Central and Western U.S. regions discussed in the text are also denoted.

## Supplementary References:

- Basu, S., Miller, J. B., and Lehman, S.: Separation of biospheric and fossil fuel fluxes of CO<sub>2</sub> by atmospheric inversion of CO<sub>2</sub> and <sup>14</sup>CO<sub>2</sub> measurements: Observation System Simulations, *Atmos. Chem. Phys.*, 16, 5665-5683, 10.5194/acp-16-5665-2016, 2016.
- Basu, S., Lehman, S. J., Miller, J. B., Andrews, A. E., Sweeney, C., Gurney, K. R., Xu, X., Southon, J., and Tans, P. P.: Estimating US fossil fuel CO<sub>2</sub> emissions from measurements of <sup>14</sup>C in atmospheric CO<sub>2</sub>, *Proceedings of the National Academy of Sciences*, 117, 13300-13307, 10.1073/pnas.1919032117, 2020.
- EIA: Monthly Energy Review: Carbon dioxide emissions from biomass energy consumption, [https://www.eia.gov/totalenergy/data/monthly/pdf/sec11\\_10.pdf](https://www.eia.gov/totalenergy/data/monthly/pdf/sec11_10.pdf), 2024.
- EPA: Inventory of U.S. Greenhouse Gas Emissions and Sinks: 1990-2022 U.S. Environmental Protection Agency, EPA 430R-24004, <https://www.epa.gov/ghgemissions/inventory-us-greenhouse-gas-emissions-and-sinks-1990-2022>, 2024.
- Gurney, K. R., Liang, J., Patarasuk, R., Song, Y., Huang, J., and Roest, G.: Vulcan: High-Resolution Annual Fossil Fuel CO<sub>2</sub> Emissions in USA, 2010-2015, Version 3, ORNL Distributed Active Archive Center [dataset], 10.3334/ORNLDAAC/1810, 2020a.
- Gurney, K. R., Liang, J., Patarasuk, R., Song, Y., Huang, J., and Roest, G.: The Vulcan Version 3.0 High-Resolution Fossil Fuel CO<sub>2</sub> Emissions for the United States, *Journal of Geophysical Research: Atmospheres*, 125, e2020JD032974, <https://doi.org/10.1029/2020JD032974>, 2020b.
- Jacobson, A. R., Schuldt, K. N., Tans, P., Arlyn, A., Miller, J. B., Oda, T., Mund, J., Weir, B., Ott, L., Aalto, T., Abshire, J. B., Aikin, K., Aoki, S., Apadula, F., Arnold, S., Baier, B., Bartyzel, J., Beyersdorf, A., Biermann, T., Biraud, S. C., Boenisch, H., Brailsford, G., Brand, W. A., Chen, G., Huilin, C., Lukasz, C., Clark, S., Colomb, A., Commane, R., Conil, S., Couret, C., Cox, A., Cristofanelli, P., Cuevas, E., Curcoll, R., Daube, B., Davis, K. J., De Wekker, S., Coletta, J. D., Delmotte, M., DiGangi, E., DiGangi, J. P., Di Sarra, A. G., Dlugokencky, E., Elkins, J. W., Emmenegger, L., Shuangxi, F., Fischer, M. L., Forster, G., Frumau, A., Galkowski, M., Gatti, L. V., Gehrlein, T., Gerbig, C., Francois, G., Gloor, E., Gomez-Trueba, V., Goto, D., Griffis, T., Hammer, S., Hanson, C., Haszpra, L., Hatakka, J., Heimann, M., Heliasz, M., Hensen, A., Hermansen, O., Hintsa, E., Holst, J., Ivakhov, V., Jaffe, D. A., Jordan, A., Joubert, W., Karion, A., Kawa, S. R., Kazan, V., Keeling, R. F., Keronen, P., Kneuer, T., Kolari, P., Kateřina, K., Kort, E., Kozlova, E., Krummel, P., Kubistin, D., Labuschagne, C., Lam, D. H. Y., Lan, X., Langenfelds, R. L., Laurent, O., Laurila, T., Lauvaux, T., Lavric, J., Law, B. E., Lee, J., Lee, O. S. M., Lehner, I., Lehtinen, K., Leppert, R., Leskinen, A., Leuenberger, M., Levin, I., Levula, J., Lin, J., Lindauer, M., Loh, Z., Lopez, M., Luijkx, I. T., Lunder, C. R., Machida, T., Mammarella, I., Manca, G., Manning, A., Manning, A., Marek, M. V., Martin, M. Y., Matsueda, H., McKain, K., Meijer, H., Meinhardt, F., Merchant, L., Mihalopoulos, N., Miles, N. L., Miller, C. E., Mitchell, L., Mölder, M., Montzka, S., Moore, F., Moossen, H., Morgan, E., Josep-Anton, M., Morimoto, S., Müller-Williams, J., Munger, J. W., Munro, D., Myhre, C. L., Shin-Ichiro, N., Jaroslaw, N., Newman, S., Nichol, S., Niwa, Y., Obersteiner, F., O'Doherty, S., Paplawsky, B., Peischl, J., Peltola, O., Piacentino, S., Jean-Marc, P., Pickers, P., Piper, S., Pitt, J., Plass-Dülmer, C., Platt, S. M., Prinzivalli, S., Ramonet, M., Ramos, R., Reyes-Sanchez, E., Richardson, S. J., Riris, H., Rivas, P. P., Ryerson, T., Saito, K., Sargent, M., Sasakawa, M., Scheeren, B., Schuck, T., Schumacher, M., Seifert, T., Sha, M. K., Shepson, P., Shook, M., Sloop, C. D., Smith, P., Stanley, K., Steinbacher, M., Stephens, B.,

Sweeney, C., Thoning, K., Timas, H., Torn, M., Tørseth, K., Trisolino, P., Turnbull, J., Van Den Bulk, P., Van Dinter, D., Vermeulen, A., Viner, B., Vitkova, G., Walker, S., Watson, A., Wofsy, S. C., Worsley, J., Worthy, D., Dickon, Y., Zaehle, S., Zahn, A., and Miroslaw, Z.: CarbonTracker CT2022, 10.25925/Z1GJ-3254, 2023.

Meirink, J. F., Bergamaschi, P., and Krol, M. C.: Four-dimensional variational data assimilation for inverse modelling of atmospheric methane emissions: method and comparison with synthesis inversion, *Atmos. Chem. Phys.*, 8, 6341-6353, 10.5194/acp-8-6341-2008, 2008.

Miller, J. B., Lehman, S. J., Andrews, A., Sweeney, C., McKain, K., Tans, P., Southon, J., Hammer, S., Turnbull, J., and Xu, X.: Numerical Representation of Contemporary Atmospheric  $\Delta^{14}\text{CO}_2$ : 2. Three-Dimensional Simulation and Comparison With Observations, *Global Biogeochemical Cycles*, 39, 10.1029/2025gb008523, 2025.

Turnbull, J. C., Sweeney, C., Karion, A., Newberger, T., Lehman, S. J., Tans, P. P., Davis, K. J., Lauvaux, T., Miles, N. L., Richardson, S. J., Cambaliza, M. O., Shepson, P. B., Gurney, K., Patarasuk, R., and Razlivanov, I.: Toward quantification and source sector identification of fossil fuel CO<sub>2</sub> emissions from an urban area: Results from the INFLUX experiment, *Journal of Geophysical Research: Atmospheres*, 120, 292-312, <https://doi.org/10.1002/2014JD022555>, 2015.

Turnbull, J. C., Karion, A., Davis, K. J., Lauvaux, T., Miles, N. L., Richardson, S. J., Sweeney, C., McKain, K., Lehman, S. J., Gurney, K. R., Patarasuk, R., Liang, J., Shepson, P. B., Heimbürger, A., Harvey, R., and Whetstone, J.: Synthesis of Urban CO<sub>2</sub> Emission Estimates from Multiple Methods from the Indianapolis Flux Project (INFLUX), *Environmental Science & Technology*, 53, 287-295, 10.1021/acs.est.8b05552, 2019.
